# Supplementary material for: Complementary principle of evaporation: From original linear relationship to generalized nonlinear functions
Source: Copernicus journal article supplement (doi:10.5194/hess-2019-545), 2019-11-25
Supplement: Supplementary file [file hess-2019-545-AC1-supplement.pdf]

## Response to Referee #1

### General Comments

My main comment is there are still some works worth being discussed, though this review is overall complete: 1) The perspective of Lhomme and Guillioni (2006, 2010) which relates potential evaporation to surface resistance. 2) Aminzadeh et al. (2016)'s CR with  $E_p$  defined by a surface temperature. Also, there are a few latest CR studies in 2019 that are highly relevant to the submitted manuscript, e.g., Anayah & Kaluarachchi (2019) and Brutsaert et al. (2019). Could the authors discussed a little bit?

Response: Thanks for the Referee's suggestions. We will discuss these publications in the revised manuscript.

In Lhomme and Guillioni (2006, 2010)'s perspective of CR, the surface resistance is related to the equilibrium evaporation and potential evaporation. We found that it is a linear function relating  $E/E_{pen}$  to  $E_{rad}/E_{pen}$  without intercept in the normalized form. Thus, we will add following paragraph to Section "Normalized complementary functions" in the revised manuscript: "Based on the examination of the CR using a model of the convective boundary-layer with entrainment (Lhomme, 1997), Lhomme and Guillioni (2010, 2006) recommended a form of CR through the effective surface resistance of the region. Integrating this CR into Penman–Monteith equation and the normalization by  $E_{pen}$  lead to

$$\frac{E}{E_{pen}} = (1 + \omega) \frac{E_{rad}}{E_{pen}}, \quad (1)$$

where  $\omega$  is a positive coefficient accounting for the entrainment of dry air within the ABL. Equation (1) is a linear function without intercept, but was not verified and applied using observed data."

Aminzadeh et al. (2016) derived a steady state surface temperature via the surface energy balance at which the sensible heat flux is zero, and calculated  $E_{pa}$  and  $E_{po}$  using a mass-transfer type reference evaporation corresponding to current and saturated surface water content. We will discuss it in addition to the works of Morton (1983) and Szilagyi and Jozsa (2008) in the revised manuscript.

The latest studies of using CR for global ET estimation will be discussed in the revised manuscript. "B2015 by setting  $c=0$  was applied to estimate global terrestrial evaporation with calibrated  $\alpha$  as a function of aridity index (Brutsaert et al., 2019). The modified Granger's model was also applied for estimating global evaporation with 30 min spatial resolution and monthly time steps (Anayah and Kaluarachchi, 2019)."

**Specific Comments:**

Line 19: Is the boundary condition here specified to the wet environment?

Response: Yes. We will add “under wet environments” after it in the revised manuscript.

Line 40: Recent publications using GCR in 2019 for estimating evaporation should be added here.

Response: We will add Brutsaert’s latest work here.

Brutsaert, W., Cheng, L., and Zhang, L.: Spatial Distribution of Global Landscape Evaporation in the Early Twenty First Century by Means of a Generalized Complementary Approach, J Hydrometeorol, 10.1175/jhm-d-19-0208.1, 2019.

Line 87: “while” should be replaced by “whereas”?

Response: It will be revised.

Line 107: the “realistic” is compared to the former model. I think adding “more” here may be better.

Response: “more” will be added here.

Line 110: “wss”??

Response: We are sorry for the typo. It should be “was”

Line 167: “The asymmetric CR is widely used”, please revised this sentence

Response: We will replace this sentence by “The asymmetric CR is a significant improvement of the symmetric CR, and the opposite changes of  $E/E_{po}$  and

$E_{pa}/E_{po}$  against  $E/E_{pa}$  were treated as an enhanced illustration of the CR (Hu et al., 2018; Zhang et al., 2017; Ma et al., 2015; Brutsaert et al., 2019; Szilagyi, 2007).” and revised this paragraph.

Line 179: More statements on the asymmetric CR should be added, including the negative relationship between  $E/E_{po}$  and  $E_{pa}/E_{po}$  was treated as an extension of the original CR, and the validation in several locations.

Response: More statements will be added, as “The asymmetric CR is a significant improvement of the symmetric CR, and the opposite changes of  $E/E_{po}$  and  $E_{pa}/E_{po}$  against  $E/E_{pa}$  were treated as an enhanced illustration of the CR (Hu et al., 2018; Zhang et al., 2017; Ma et al., 2015; Brutsaert et al., 2019; Szilagyi, 2007). The performances on evaporation estimation are improved by calibrating the asymmetry parameter  $b$  (Kahler and Brutsaert, 2006; Han et al., 2008; Huntington et al., 2011; Ma et al., 2015). Efforts have also made to calculate  $b$  by using the meteorological variables, which enhance the predict ability of the CR (Szilagyi, 2015;

Szilagyi, 2007; Aminzadeh et al., 2016). However, the changes in  $b$  imply a potential nonlinear characteristic of the CR Han (2008); Lintner et al. (2015). The observed values of  $E/E_{po}$  and  $E_{pa}/E_{po}$  even exhibit a positive correlation under wet conditions at several flux sites, which challenges the CR (Han and Tian, 2018). But previous studies on the validity of CR have two limitations. First, the true correlation between  $E_{pa}$  and  $E$  would be masked when they are both plotted against moisture index (Pettijohn and Salvucci, 2009; Lintner et al., 2015). Second, the wet conditions where the two curves of  $E/E_{po}$  and  $E_{pa}/E_{po}$  approach were seldom focused, which may hide the true correlation under wet environments.”

Line 246: “Han and Tian (2018) further validated the sigmoid feature”: Please state the work more detailed because there are still controversies on it.

Response: We will revised this sentence as “Han and Tian (2018) further validated the sigmoid feature according to the much larger regression slopes of  $E/E_{Pen}$  upon  $E_{rad}/E_{Pen}$  in the middle stage than those in the other two stages with smaller or larger values of  $E_{rad}/E_{Pen}$  by using 22 eddy covariance towers from the FLUXNET (Baldocchi et al., 2001) dataset which includes representative biomes of grasslands, croplands, shrublands, evergreen needleleaf forests, deciduous broadleaf forests, and wetlands.”

Line 270: What is the essential difference between B15 and H12? Is “B15 inherits all three types of evaporation dated from the original CR”? Please rearrange these sentences.

Response: The two generalized complementary approaches, H12 and B15, are essentially different, with completely different normalized variables (Table 3). B15 inherits the concept of the three types of evaporation dated from the original CR, and its boundary conditions and analytical form are derived for  $x_B = E_{po}/E_{pa}$  and  $y_B = E/E_{pa}$ . By contrast, H12 goes much further from the original CR. The boundary conditions and the analytical form of H12 are derived for  $x_H = E_{rad}/E_{Pen}$  and  $y_H = E/E_{Pen}$ . We will add a new subsection “Comparisons between the two generalized complementary approaches” to discuss the essential difference between B15 and H12.

Line 304: The varying characteristics of the PT coefficient should be introduced here

Response: We will introduce it here, as “the Priestley-Taylor coefficient varies with several factors, such as the relative transport efficiency of turbulent, or the

surface/air temperature (Assouline et al., 2016; Szilagyi, 2014).”

Line 359: Brutsaert’s recent work by using  $c=0$  and varying PT coefficient should be added. Check Brutsaert et al. (2019).

Response: We will add it here.

The Conclusion part could be improved. I wonder are there any outlooks for future studies on CR could be summarized using a few sentences here?

Response: We will rearrange the conclusion part and add three points about future studies: 1) Integrating the complementary principle with other approaches for future development; 2) Assessing the generalized complementary functions over varied places with gradient climate and landscape features; and 3) increasing the accuracy of evaporation estimation while reducing the burdens of parameterization.

### **Reference:**

- Aminzadeh, M., Roderick, M. L., and Or, D.: A generalized complementary relationship between actual and potential evaporation defined by a reference surface temperature, *Water Resour Res*, 52, 385-406, 10.1002/2015wr017969, 2016.
- Anayah, F. M., and Kaluarachchi, J. J.: Estimating Global Distribution of Evapotranspiration and Water Balance Using Complementary Methods, *Atmos Ocean*, 57, 279-294, 10.1080/07055900.2019.1656052, 2019.
- Assouline, S., Li, D., Tyler, S., Tanny, J., Cohen, S., Bou-Zeid, E., Parlange, M., and Katul, G. G.: On the variability of the Priestley-Taylor coefficient over water bodies, *Water Resour Res*, 52, 150-163, 10.1002/2015wr017504, 2016.
- Baldocchi, D., Falge, E., Gu, L., Olson, R., Hollinger, D., Running, S., Anthoni, P., Bernhofer, C., Davis, K., and Evans, R.: FLUXNET: A new tool to study the temporal and spatial variability of ecosystem-scale carbon dioxide, water vapor, and energy flux densities, *B Am Meteorol Soc*, 82, 2415-2434, 2001.
- Brutsaert, W., Cheng, L., and Zhang, L.: Spatial Distribution of Global Landscape Evaporation in the Early Twenty First Century by Means of a Generalized Complementary Approach, *J Hydrometeorol*, 10.1175/jhm-d-19-0208.1, 2019.
- Han, S.: Study on Complementary Relationship of Evapotranspiration and its Application in Tarim River Basin, Ph.D, Tsinghua University, Beijing, 2008.
- Han, S., Hu, H., and Tian, F.: Evaluating the advection-aridity model of evaporation using data from field-sized surfaces of HEIFE, *IAHS Publication*, 322, 9-14, 2008.
- Han, S., and Tian, F.: Derivation of a sigmoid generalized complementary function for evaporation with physical constraints, *Water Resour Res*, 54, 5050-5068, doi: 10.1029/2017WR021755, 2018.
- Hu, Z., Wang, G., Sun, X., Zhu, M., Song, C., Huang, K., and Chen, X.: Spatial - Temporal Patterns of Evapotranspiration Along an Elevation Gradient on Mount Gongga, Southwest China, *Water Resour Res*, 2018.
- Huntington, J. L., Szilagyi, J., Tyler, S. W., and Pohll, G. M.: Evaluating the complementary relationship for estimating evapotranspiration from arid shrublands, *Water Resour Res*, 47, W05533, 2011.

Kahler, D. M., and Brutsaert, W.: Complementary relationship between daily evaporation in the environment and pan evaporation, *Water Resour Res*, 42, W05413, doi:05410.01029/02005WR004541, 2006.

Lhomme, J. P.: An examination of the Priestley-Taylor equation using a convective boundary layer model, *Water Resour Res*, 33, 2571-2578, 1997.

Lhomme, J. P., and Guilioni, L.: Comments on some articles about the complementary relationship, *J Hydrol*, 323, 1-3, 2006.

Lhomme, J. P., and Guilioni, L.: On the link between potential evaporation and regional evaporation from a CBL perspective, *Theor Appl Climatol*, 101, 143-147, 2010.

Lintner, B., Gentine, P., Findell, K., and Salvucci, G.: The Budyko and complementary relationships in an idealized model of large-scale land-atmosphere coupling, *Hydrol Earth Syst Sc*, 19, 2119-2131, 2015.

Ma, N., Zhang, Y., Szilagyi, J., Guo, Y., Zhai, J., and Gao, H.: Evaluating the complementary relationship of evapotranspiration in the alpine steppe of the Tibetan Plateau, *Water Resour Res*, 51, 1069-1083, 10.1002/2014wr015493, 2015.

Pettijohn, J. C., and Salvucci, G. D.: A New Two-Dimensional Physical Basis for the Complementary Relation between Terrestrial and Pan Evaporation, *J Hydrometeorol*, 10, 565-574, 10.1175/2008jhm1026.1, 2009.

Szilagyi, J.: On the inherent asymmetric nature of the complementary relationship of evaporation, *Geophys Res Lett*, 34, L02405, doi:02410.01029/02006GL028708, 2007.

Szilagyi, J.: Temperature corrections in the Priestley-Taylor equation of evaporation, *J Hydrol*, 519, 455-464, 10.1016/j.jhydrol.2014.07.040, 2014.

Szilagyi, J.: Complementary-relationship-based 30 year normals (1981-2010) of monthly latent heat fluxes across the contiguous United States, *Water Resour Res*, 51, 9367-9377, 10.1002/2015wr017693, 2015.

Zhang, L., Cheng, L., and Brutsaert, W.: Estimation of land surface evaporation using a generalized nonlinear complementary relationship, *Journal of Geophysical Research: Atmospheres*, 122, 1475-1487, 10.1002/2016jd025936, 2017.
